# Supplementary material for: RIG‐I antiviral signaling drives interleukin‐23 production and psoriasis‐like skin disease
Source: PubMed Central journal article supplement (PMC5412807; doi:10.15252/emmm.201607027), 2017-04-04
Supplement: EMMM-9-589-s001.pdf [file EMMM-9-589-s001.pdf]

## Expanded View Figures

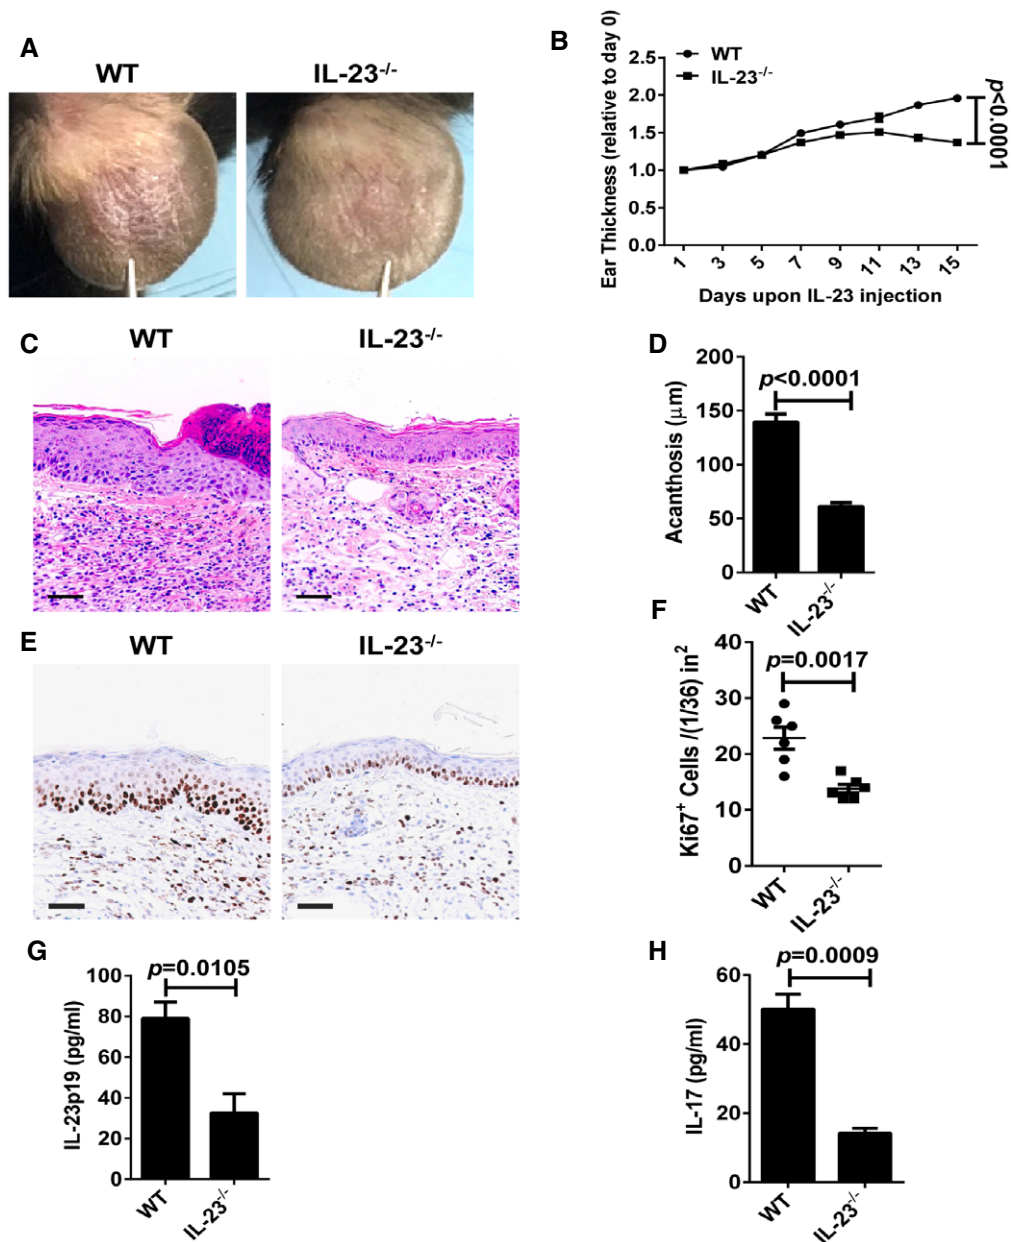

**Figure EV1.** IL-23-induced psoriasis-like skin disease is ameliorated in IL-23<sup>-/-</sup> mice.

- A** Representative photographs of the ears of WT mice (left panel) and IL-23<sup>-/-</sup> mice (right panel) after intradermal injection with IL-23 (500 ng) on every other day for 8 times,  $n = 6$  per group.
- B** The ear thickness of WT and IL-23<sup>-/-</sup> mice on the indicated day presented relative to day 0. Significant differences are indicated: one-way ANOVA,  $n = 6$  per group (mean  $\pm$  SEM).
- C** Representative H&E staining of the ears treated as in (A),  $n = 6$  per group. Scale bar: 50  $\mu\text{m}$ .
- D** Acanthosis of WT and IL-23<sup>-/-</sup> mice treated with IL-23. Significant differences are indicated: two-tailed Student's  $t$ -test,  $n = 6$  per group (mean  $\pm$  SEM).
- E** Representative immunostaining of Ki67 in ear skin derived from WT and IL-23<sup>-/-</sup> mice treated with IL-23  $n = 6$  per group. Scale bar: 50  $\mu\text{m}$ .
- F** Quantitation of Ki67<sup>+</sup> cells in ear skin derived from WT and IL-23<sup>-/-</sup> mice treated with IL-23. Significant differences are indicated: two-tailed Student's  $t$ -test,  $n = 6$  per group (mean  $\pm$  SEM).
- G, H** ELISA detection of IL-23p19 (G) and IL-17 (H) protein levels in supernatants of ear skin homogenates derived from indicated groups. Significant differences are indicated: two-tailed Student's  $t$ -test,  $n = 3$ –5 per group (mean  $\pm$  SEM).

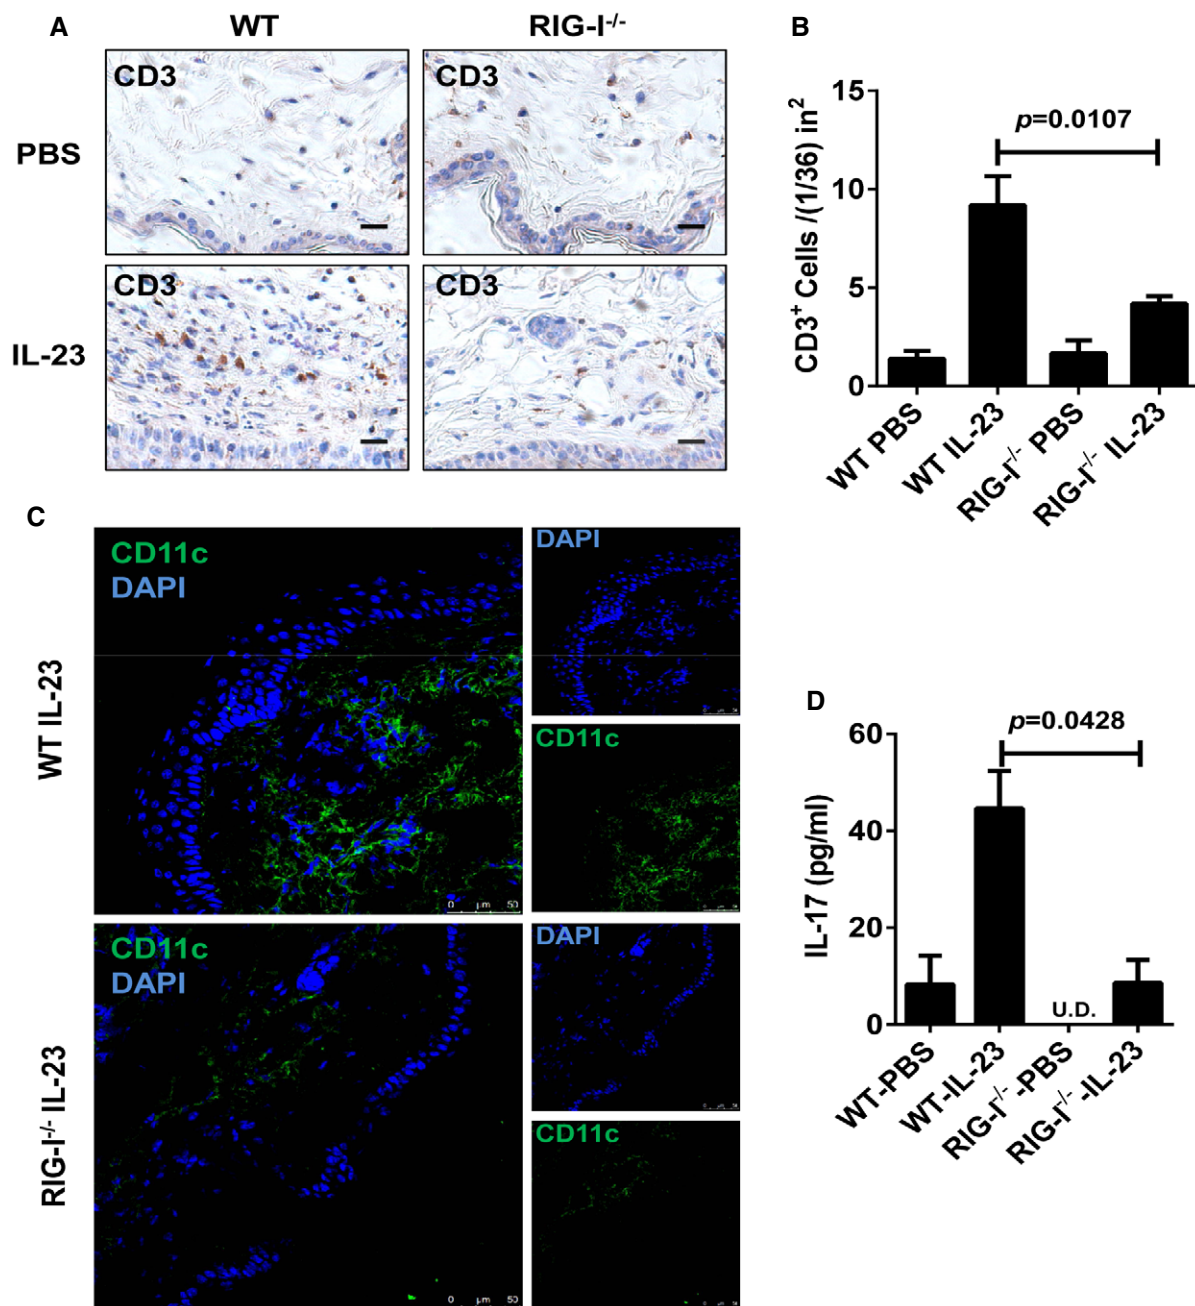

**Figure EV2. Inflammatory cell infiltrates and IL-17 expression levels in IL-23-induced mouse model.**

**A** Representative immunostaining of CD3 in ear skin derived from WT and RIG-I<sup>-/-</sup> mice treated with PBS or IL-23, *n* = 3–5 per group. Scale bar: 20  $\mu$ m.

**B** Quantitation of CD3<sup>+</sup> cells in ear skin derived from WT and RIG-I<sup>-/-</sup> mice treated with PBS or IL-23. Significant differences are indicated: two-tailed Student's *t*-test, *n* = 3–5 per group (mean  $\pm$  SEM).

**C** Representative immunofluorescence staining of CD11c in ear skin derived from WT and RIG-I<sup>-/-</sup> mice treated with IL-23, *n* = 3–5 per group. Scale bar: 50  $\mu$ m.

**D** ELISA detection of IL-17 protein levels in supernatants of ear skin homogenates derived from indicated groups. Significant differences are indicated: two-tailed Student's *t*-test, *n* = 3 per group (mean  $\pm$  SEM).

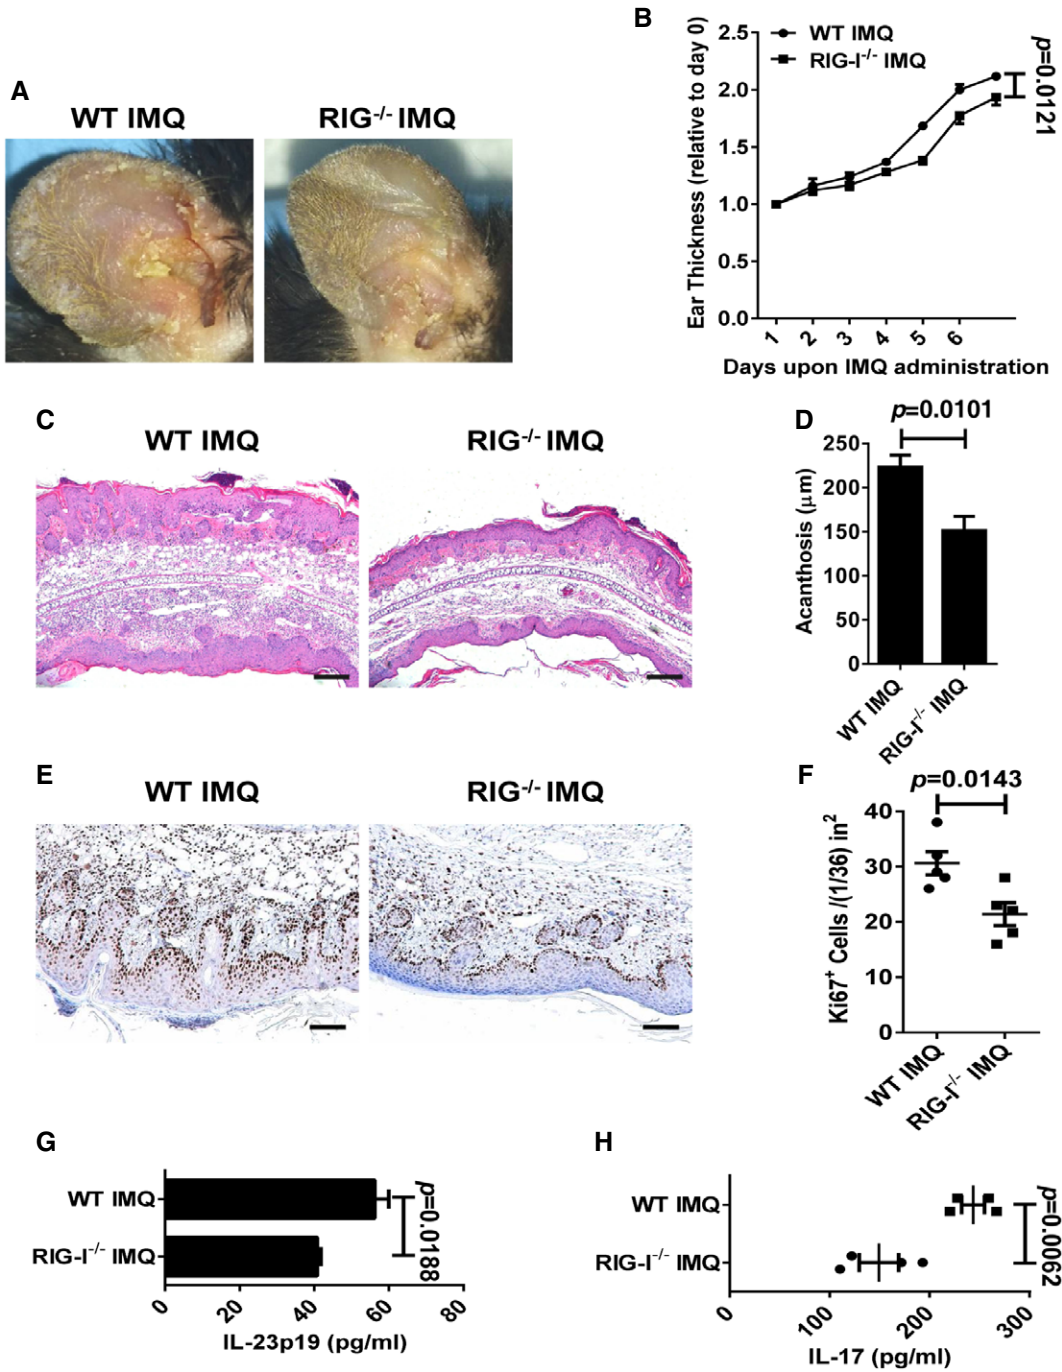

**Figure EV3.** IMQ-induced psoriasis-like skin disease is attenuated in RIG-I<sup>-/-</sup> mice.

- A Representative photographs of the ears of WT mice (left panel) and RIG-I<sup>-/-</sup> mice (right panel) after administration of imiquimod (IMQ) for 7 days,  $n = 4$  per group.
- B The ear thickness of WT and RIG-I<sup>-/-</sup> mice on the indicated day presented relative to day 0. Significant differences are indicated: one-way ANOVA,  $n = 4$  per group (mean  $\pm$  SEM).
- C Representative H&E staining of the ears treated as in (A),  $n = 4$  per group. Scale bar: 200  $\mu\text{m}$ .
- D Acanthosis of WT and RIG-I<sup>-/-</sup> mice treated with imiquimod. Significant differences are indicated: two-tailed Student's  $t$ -test,  $n = 5$  per group (mean  $\pm$  SEM).
- E Representative immunostaining of Ki67 in ear skin derived from WT and RIG-I<sup>-/-</sup> mice treated with imiquimod,  $n = 5$  per group. Scale bar: 100  $\mu\text{m}$ .
- F Quantitation of Ki67<sup>+</sup> cells in ear skin derived from WT and RIG-I<sup>-/-</sup> mice treated with imiquimod. Significant differences are indicated: two-tailed Student's  $t$ -test,  $n = 5$  per group (mean  $\pm$  SEM).
- G, H ELISA detection of IL-23p19 (G) and IL-17 (H) protein levels in supernatants of ear skin homogenates derived from indicated groups. Significant differences are indicated: two-tailed Student's  $t$ -test,  $n = 3-4$  per group (mean  $\pm$  SEM).

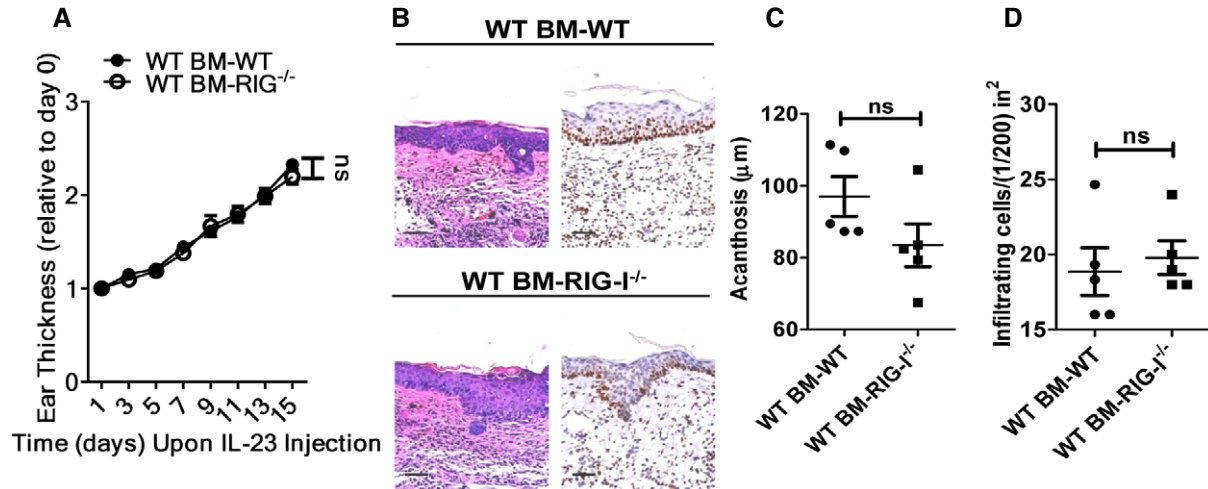

**Figure EV4. RIG-I expression in non-haematopoietic cells is not required for IL-23-induced psoriasis-like skin inflammation.**

- A** Lethally irradiated WT and RIG-I<sup>-/-</sup> mice were adoptively transferred with WT bone marrow (BM) cells, and the generated chimeric mice were subjected to IL-23-induced psoriasis-like skin inflammation. Data are presented on the indicated day relative to day 0. Significant differences are indicated: one-way ANOVA,  $n = 5$  per group (mean ± SEM).
- B** Representative H&E staining and Ki67 immunostaining of the ears treated as in (A),  $n = 5$  per group. Scale bar: 50 μm.
- C, D** Acanthosis (C) and dermal cellular infiltrates (D) of WT BM-WT or WT BM-RIG-I<sup>-/-</sup> mice treated with IL-23. Significant differences are indicated: two-tailed Student's *t*-test,  $n = 5$  per group (mean ± SEM).

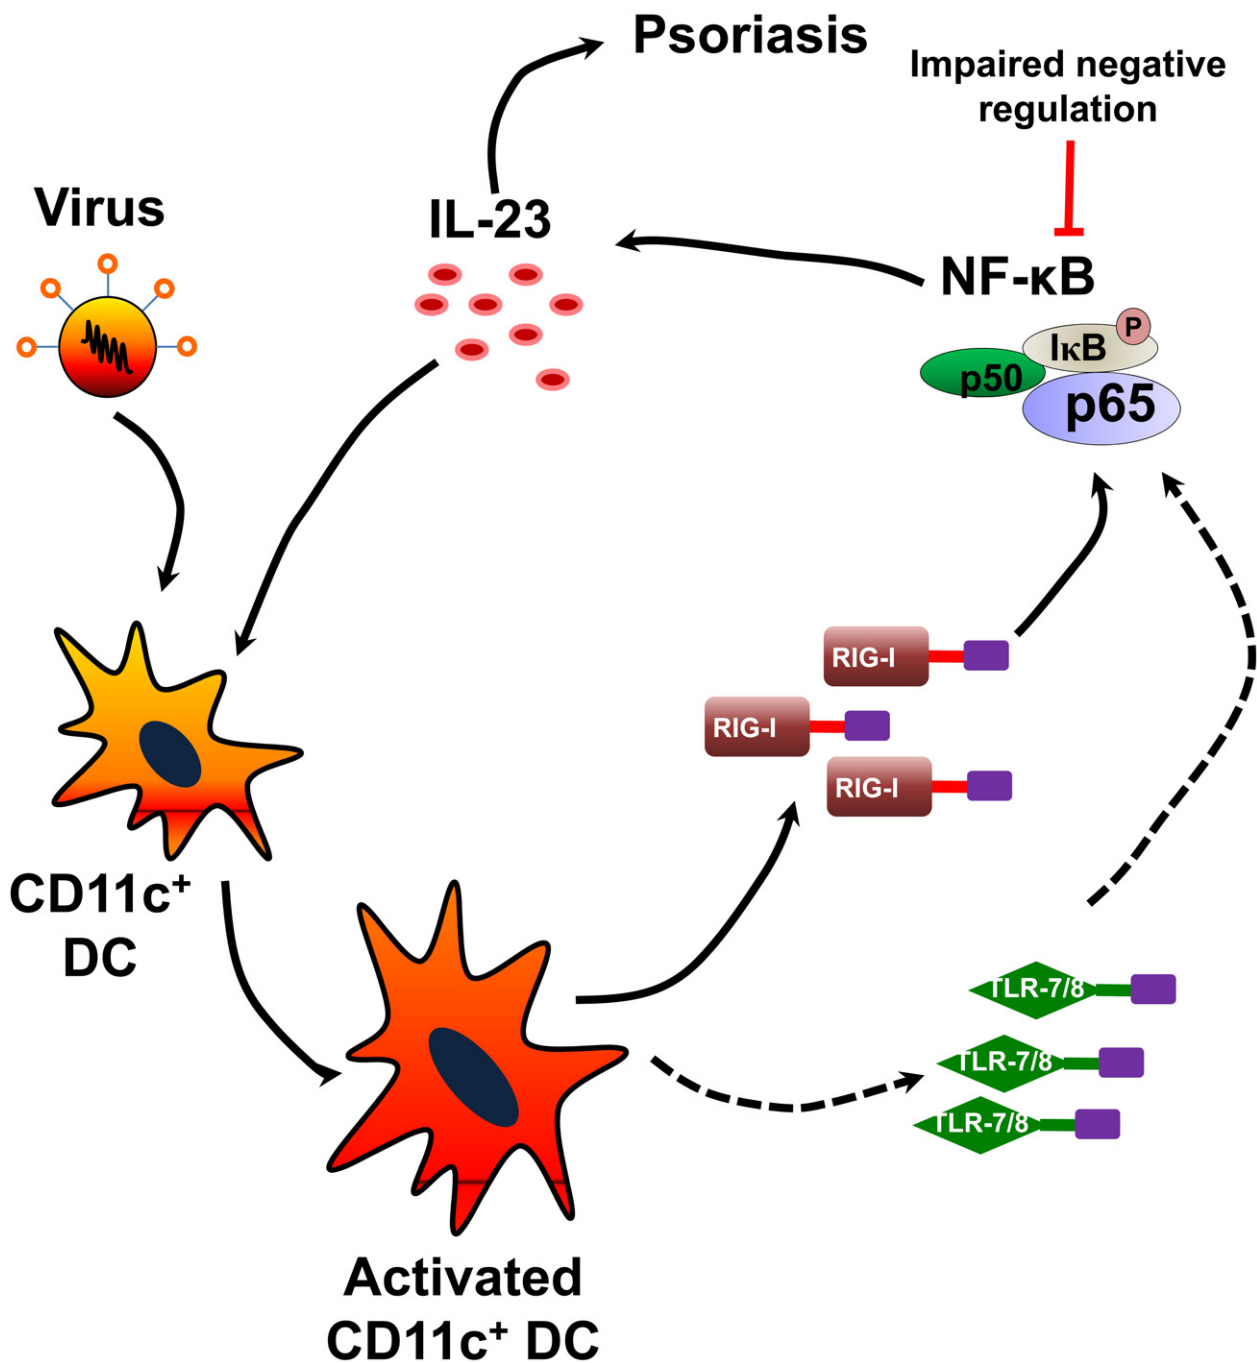

**Figure EV5. Schematic diagram of how the antiviral signaling mediates psoriasis pathogenesis.** In genetically predisposed individuals, the virus infection causes the activation of TLR-7/8 and/or RIG-I, and subsequently triggers IL-23 release by CD11c<sup>+</sup> DCs via the NF-κB pathway. Genetic mutations in NF-κB-related genes result in an impaired negative regulation of its proinflammatory activity accompanied by uncontrolled IL-23 release, thus leading to psoriasis.
