# Supplementary material for: RIG‐I antiviral signaling drives interleukin‐23 production and psoriasis‐like skin disease
Source: PubMed Central journal article supplement (PMC5412807; doi:10.15252/emmm.201607027), 2017-04-04

**Figure 1G**

**RIG-I**

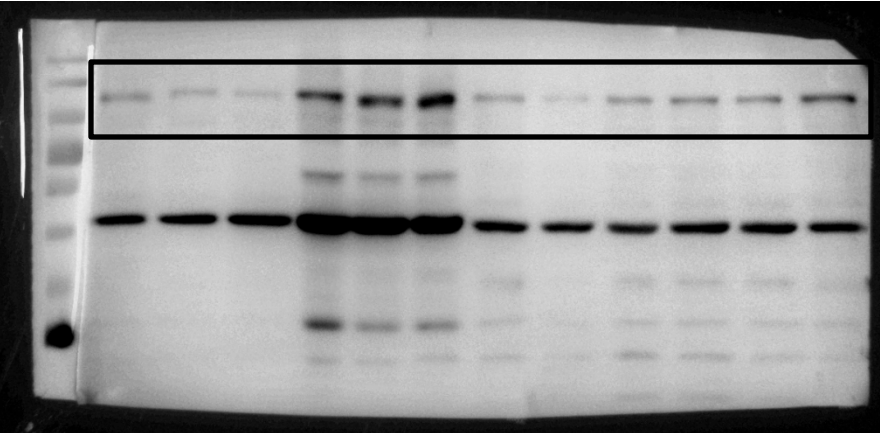

**p-I $\kappa$ B- $\alpha$**

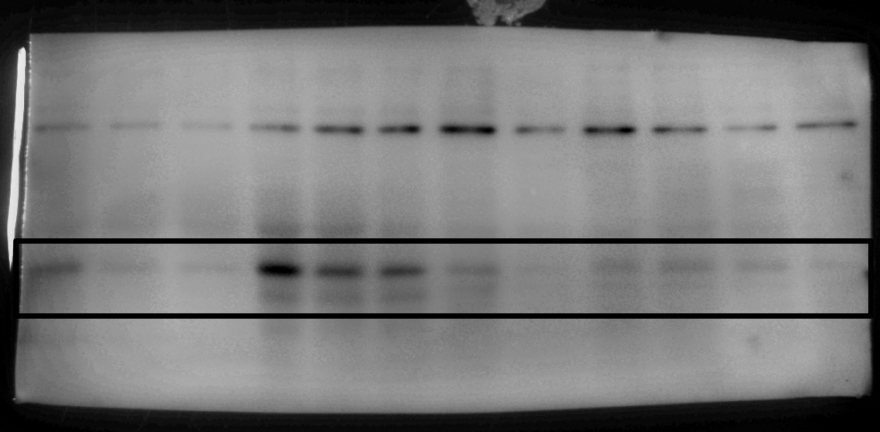

**$\beta$ -actin**

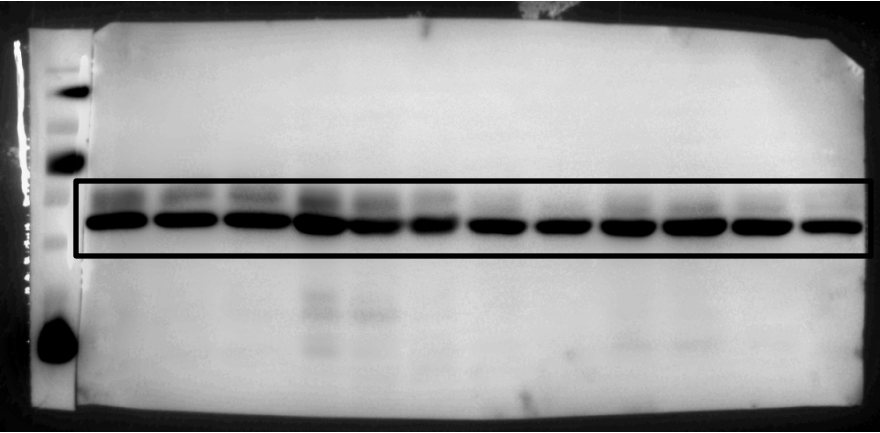

Supplement: EMMM-9-589-s004.pdf [file EMMM-9-589-s004.pdf]
