# Supplementary material for: RIG‐I antiviral signaling drives interleukin‐23 production and psoriasis‐like skin disease
Source: PubMed Central journal article supplement (PMC5412807; doi:10.15252/emmm.201607027), 2017-04-04

**Figure 7A**

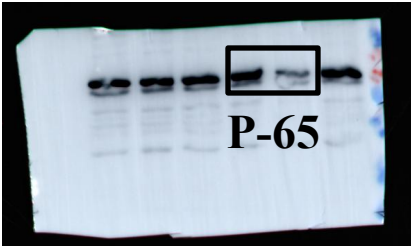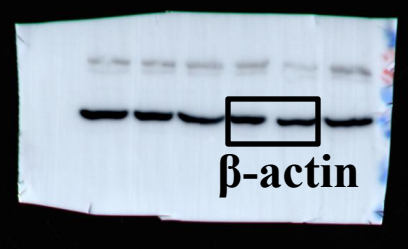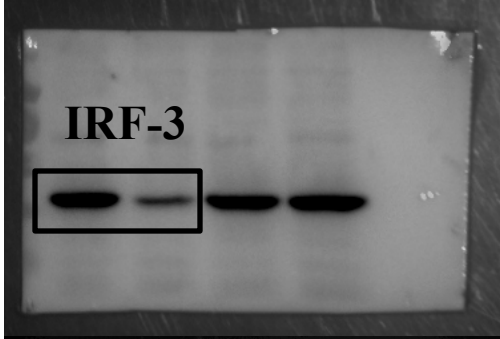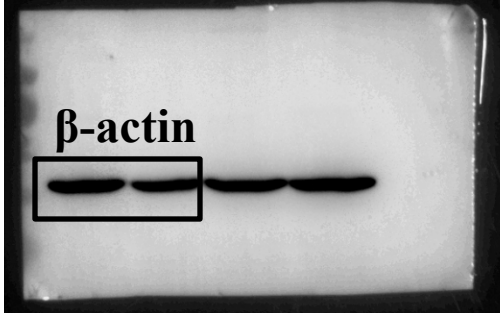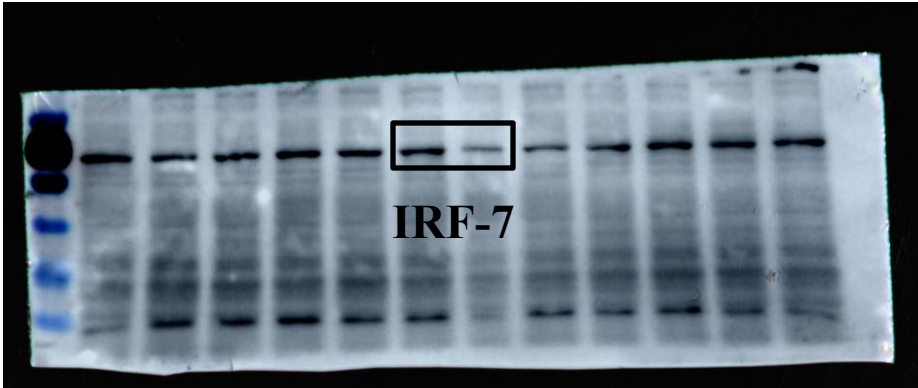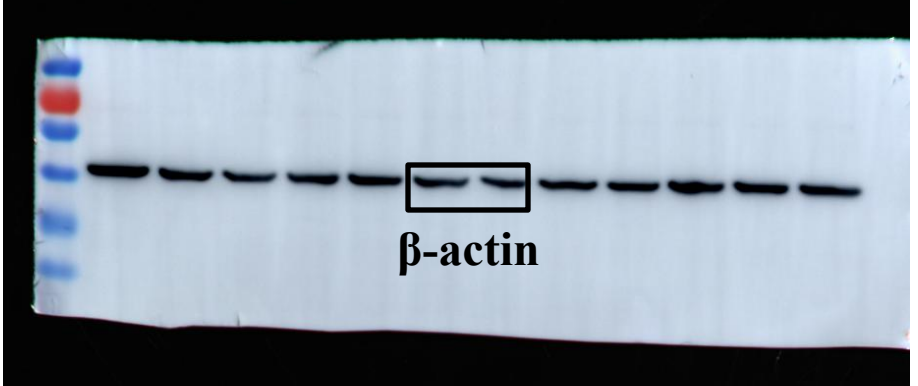

Supplement: EMMM-9-589-s007.pdf [file EMMM-9-589-s007.pdf]
